# Supplementary material for: A Novel Low-Cost Photocatalyst: Preparation, Characterization, and Photocatalytic Properties of CeO2-Diatomite Composites
Source: MDPI journal article supplement (doi:10.3390/w14213373), 2022-10-24
Supplement: s1 [file s1]

## **Supplementary Information**

### **Part I. Characterization of Diatomites and CeO<sub>2</sub>-Diatomite Composites**

#### **ESEM Analysis**

EDAX spectra of D, MD, and corresponding CeO<sub>2</sub>-diatomite composites expressing the elemental composition were displayed in Figure S1.

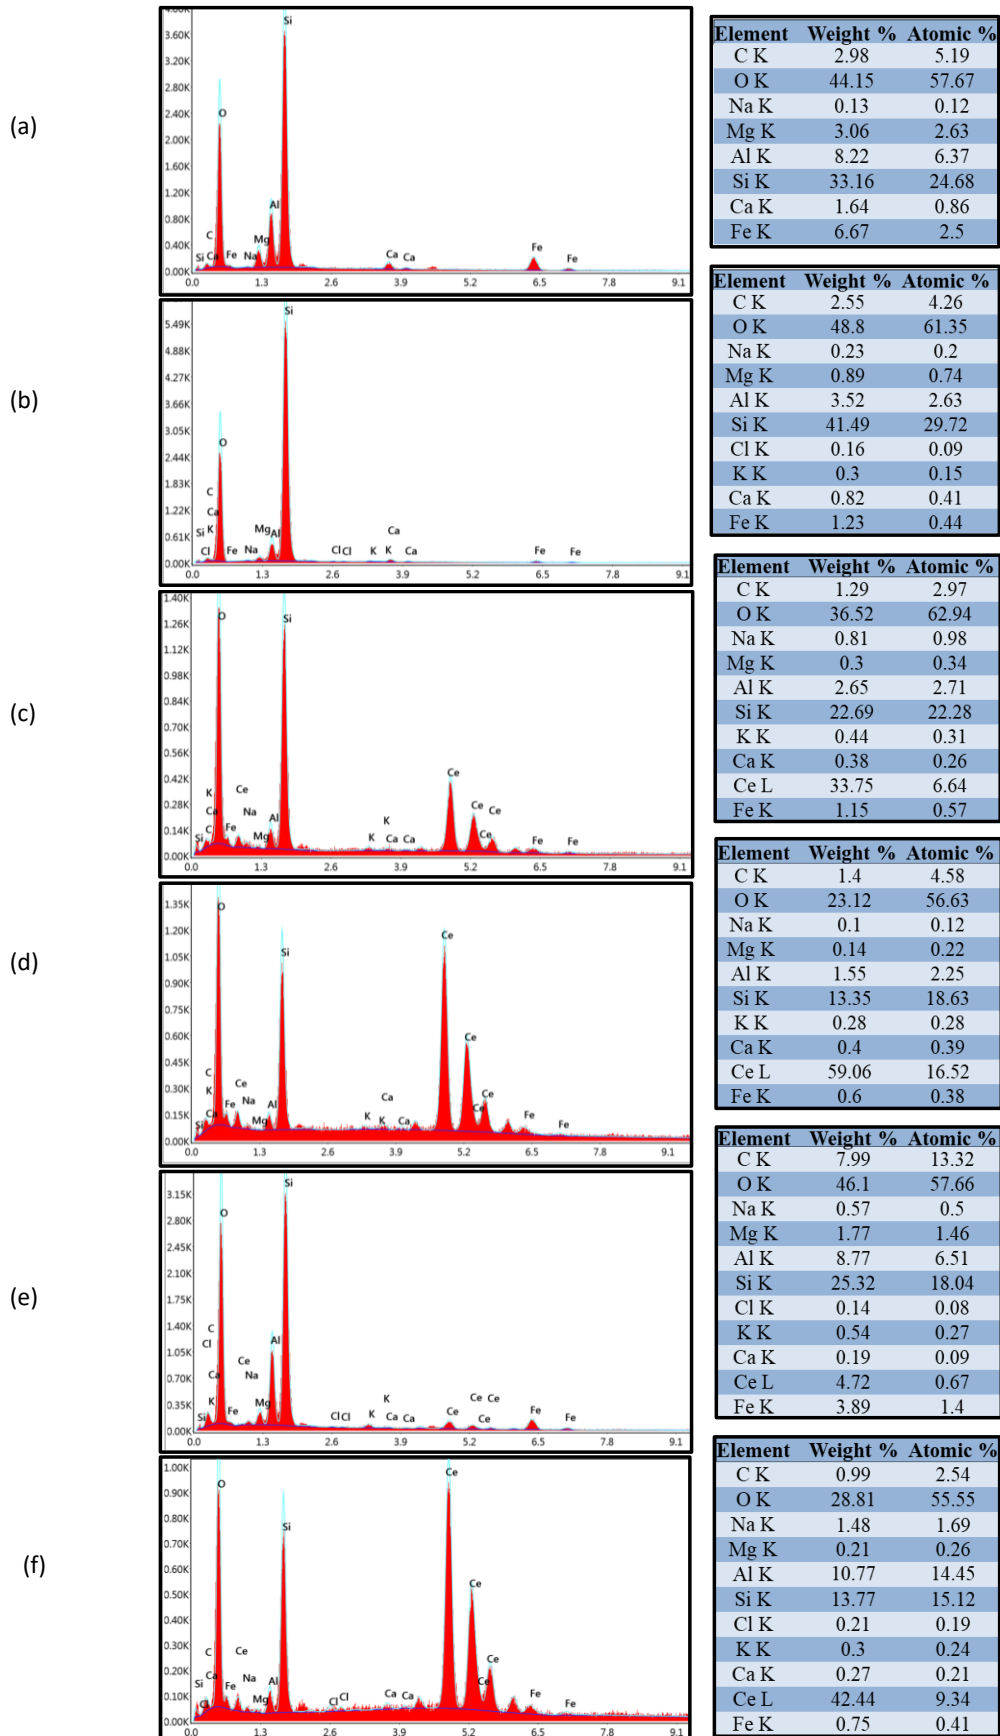

**Figure S1.** EDAX spectra of (a) D, (b) MD, (c) DC-11, (d) DC-12, (e) MDC-11, (f) MDC-12.

## BET Analysis

BET adsorption/desorption isotherms and BJH pore-size distribution curves of diatomites and representative CeO<sub>2</sub>-diatomite composites were displayed in Figure S2 and Figure S3.

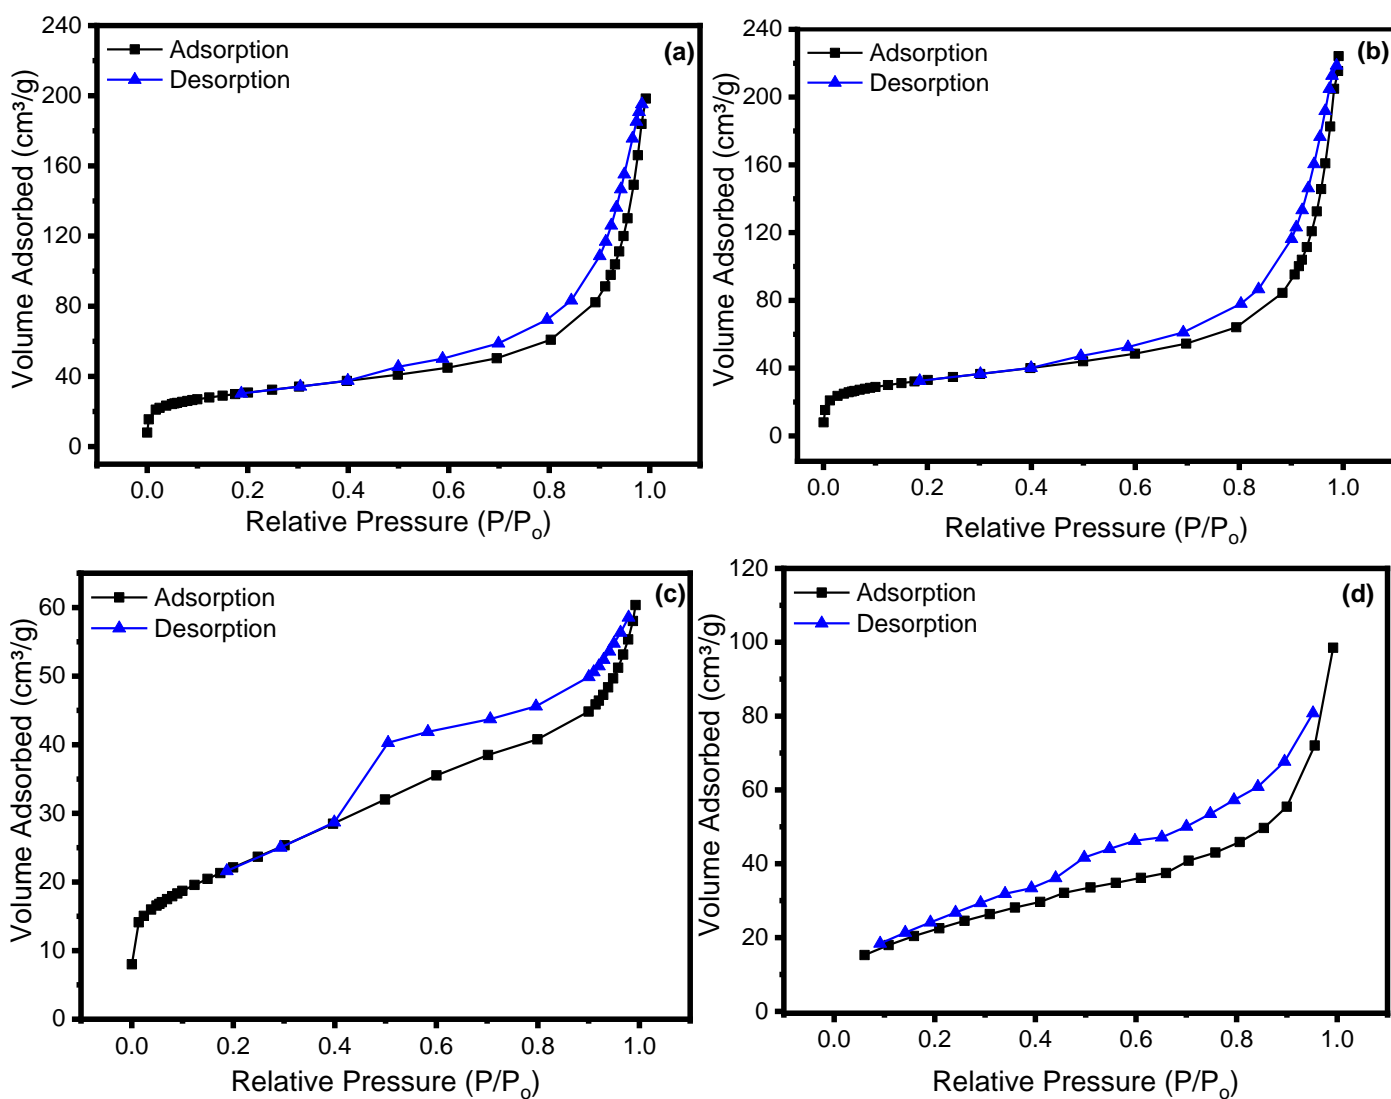

**Figure S2.** BET adsorption-desorption isotherms of (a) D, (b) MD, (c) DC-11, (d) MDC-11.

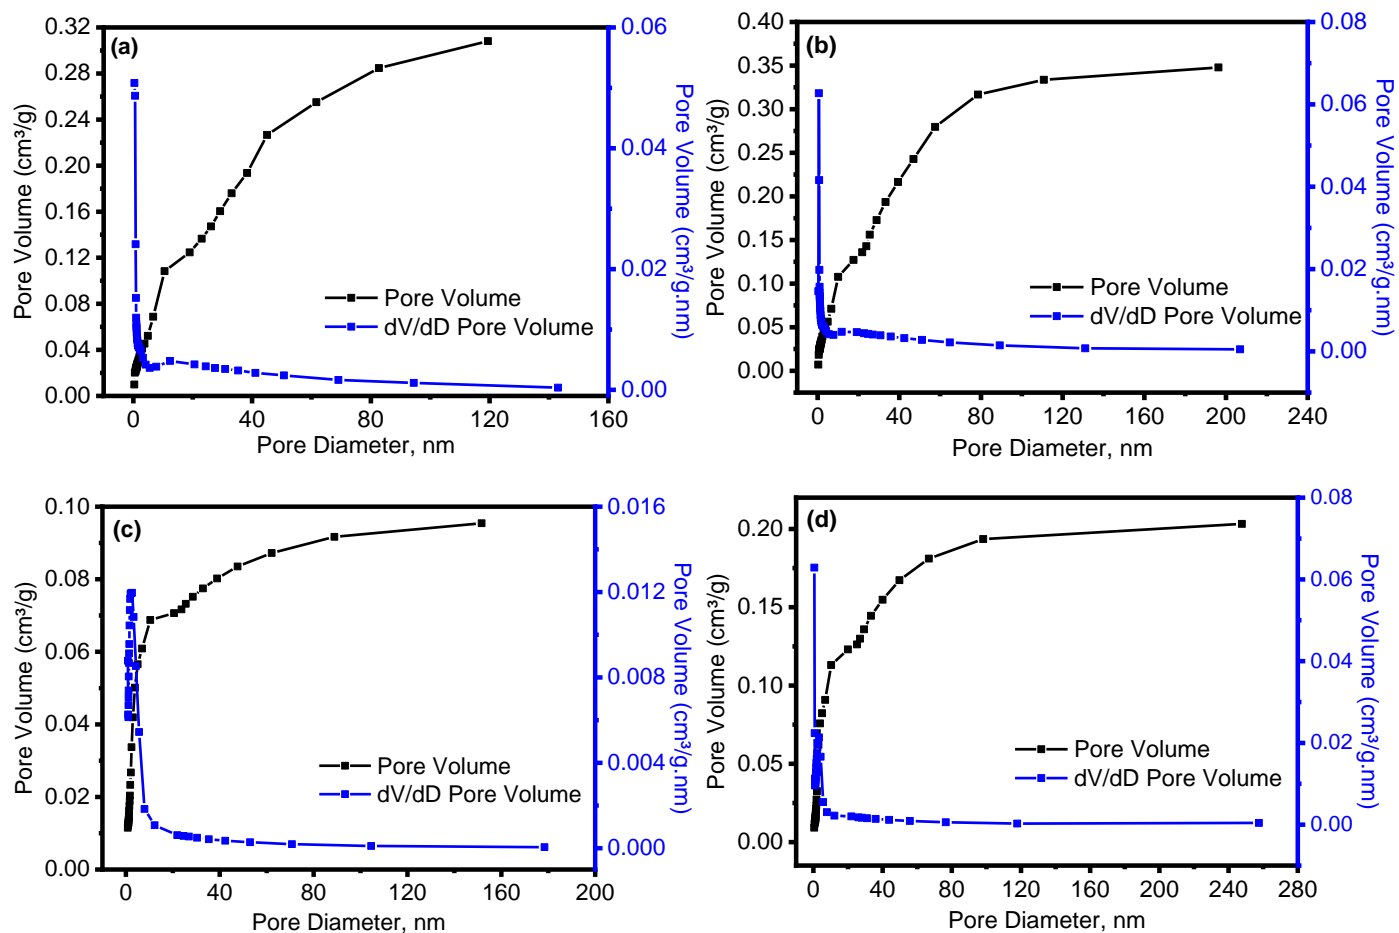

**Figure S3.** Pore size distributions of (a) D, (b) MD, (c) DC-11, (d) MDC-11.

## Zeta Potential Analysis

Zeta potential of analysis of diatomites and  $\text{CeO}_2$ -diatomite composites were displayed in Figure S4.

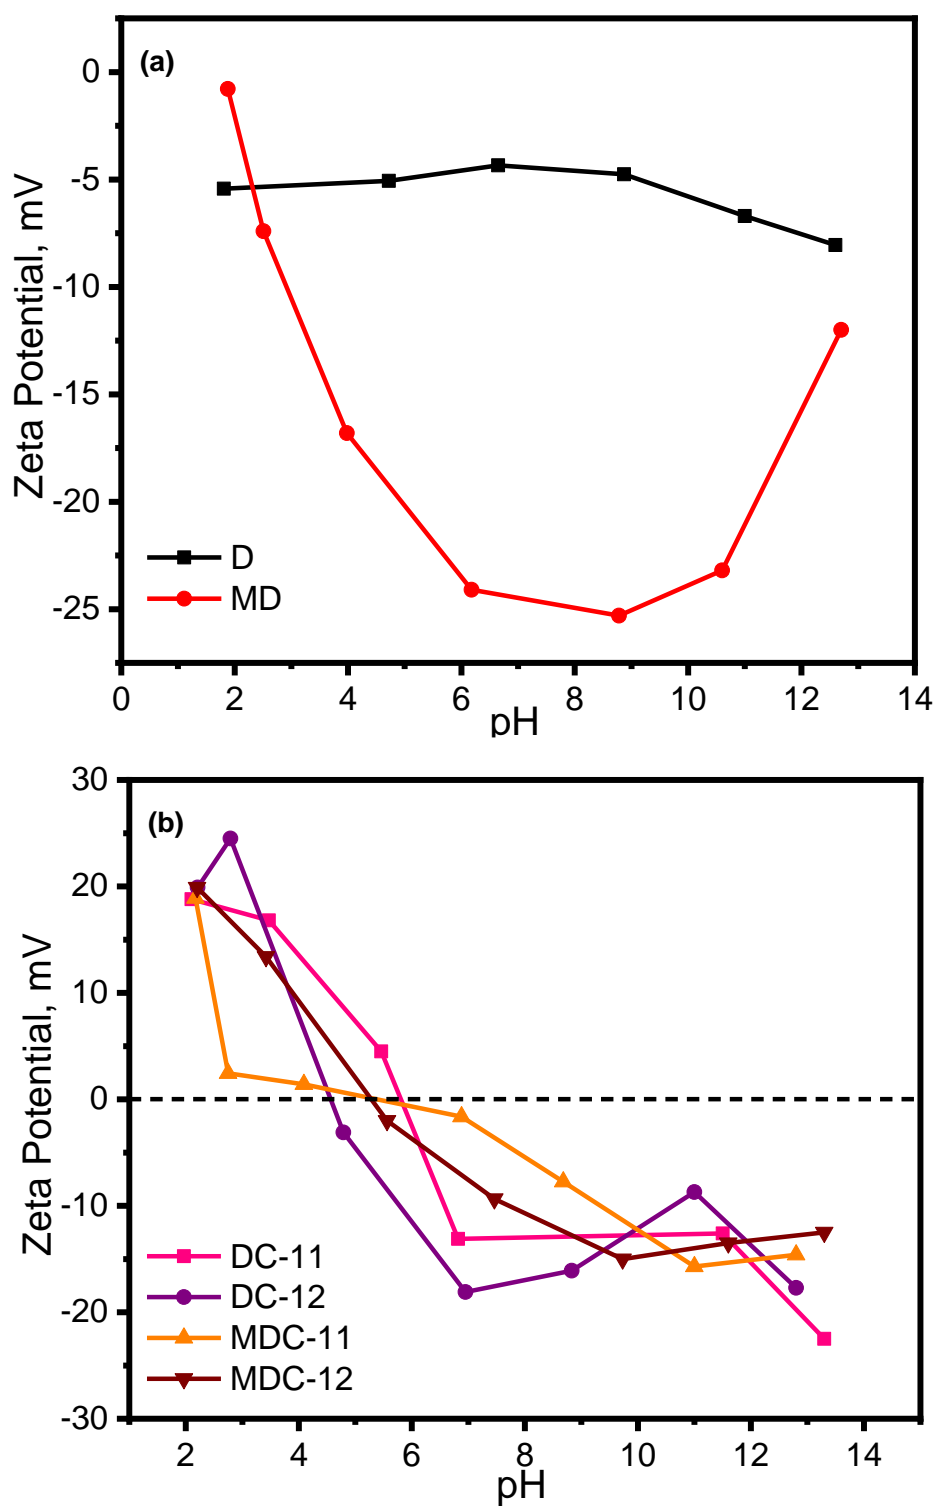

**Figure S4.** Zeta potential plots of (a) diatomites, (b)  $\text{CeO}_2$ -diatomite composites as a function of pH.

## Part II. Photocatalytic Degradation of MB using CeO<sub>2</sub>-diatomite Composites

UV-vis spectral features of MB with different irradiation times (0-300 min) using two different CeO<sub>2</sub>-diatomite composites doses (0.25 mg/L and 0.50 mg/L) were shown in Figure S5 and Figure S6.

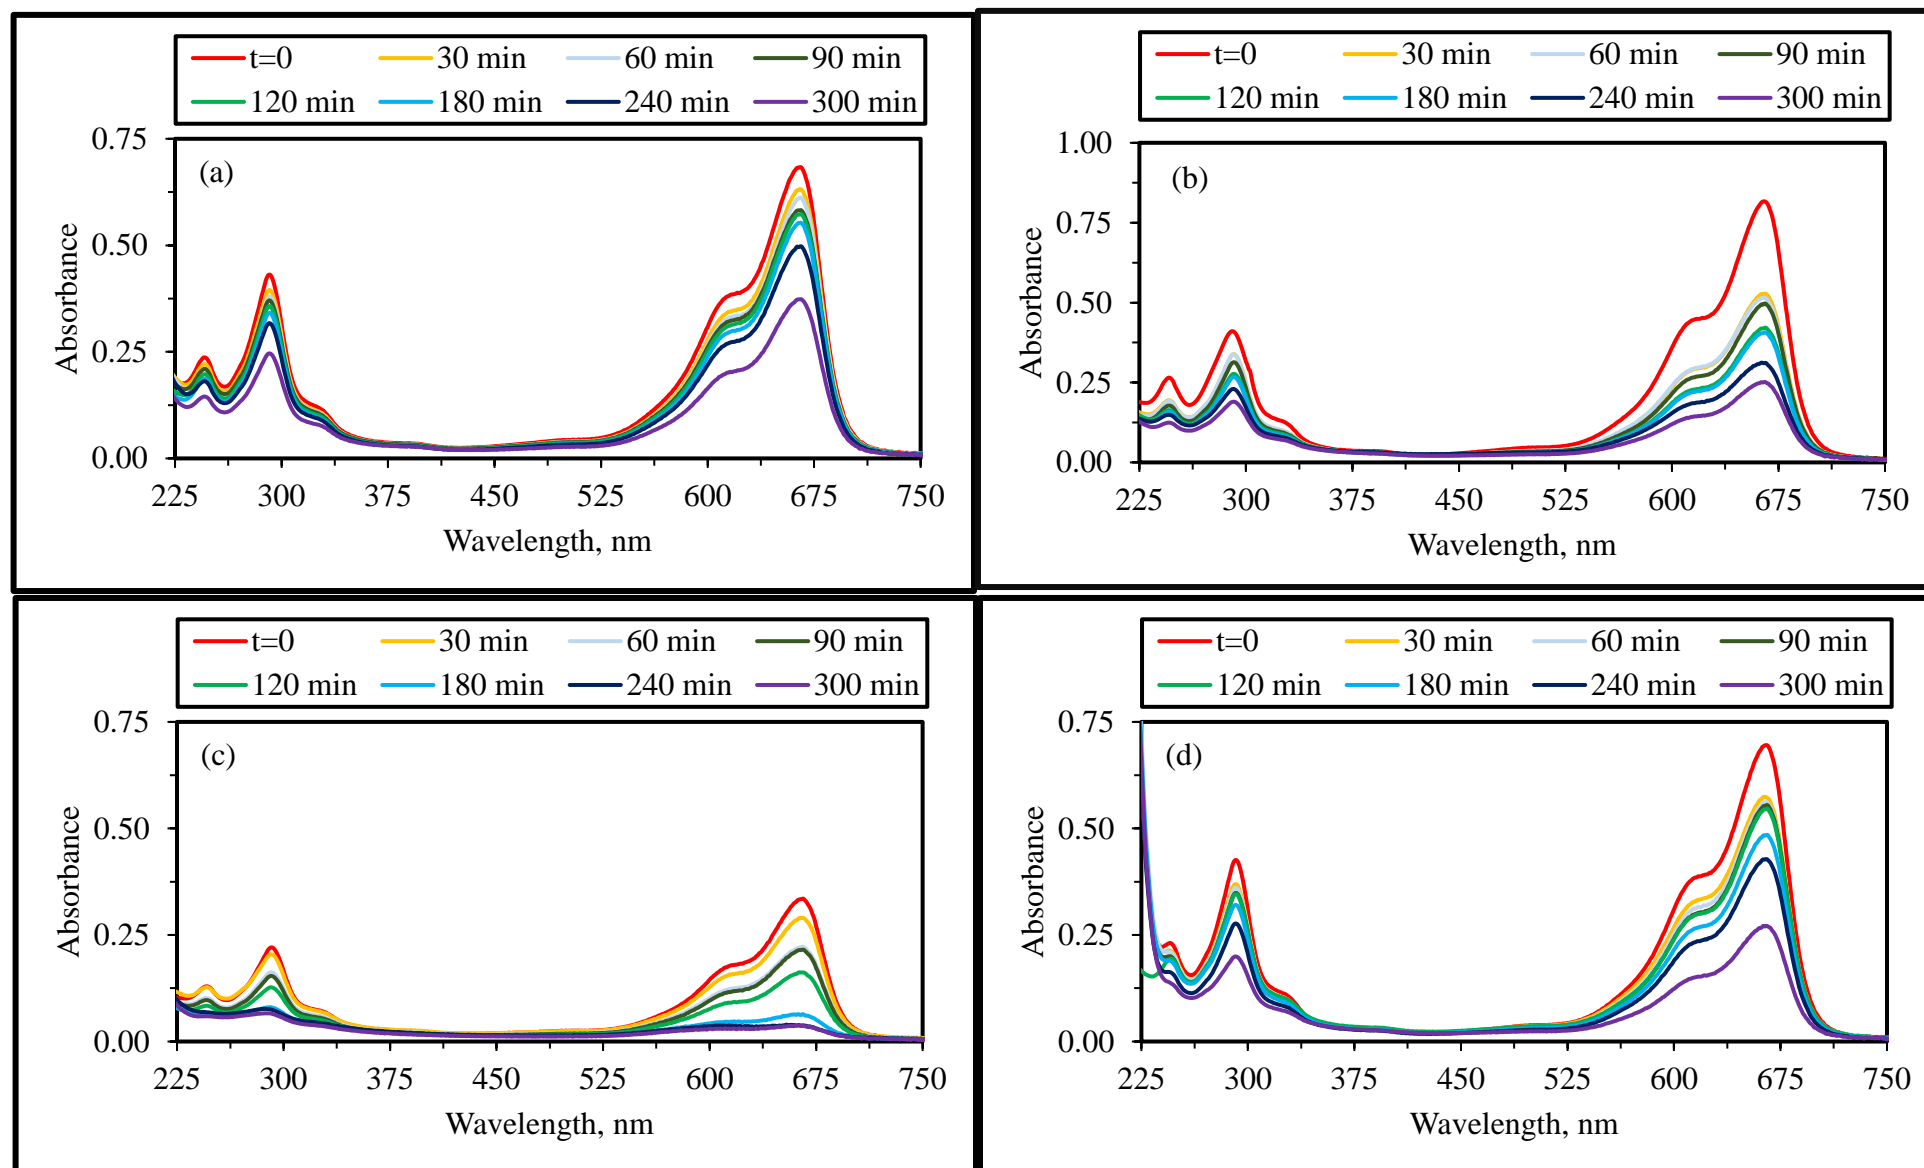

**Figure S5.** UV-vis absorption spectra of MB using 0.25 mg/mL dose of (a) DC-11, (b) DC-12, (c) MDC-11, and (d) MDC-12.

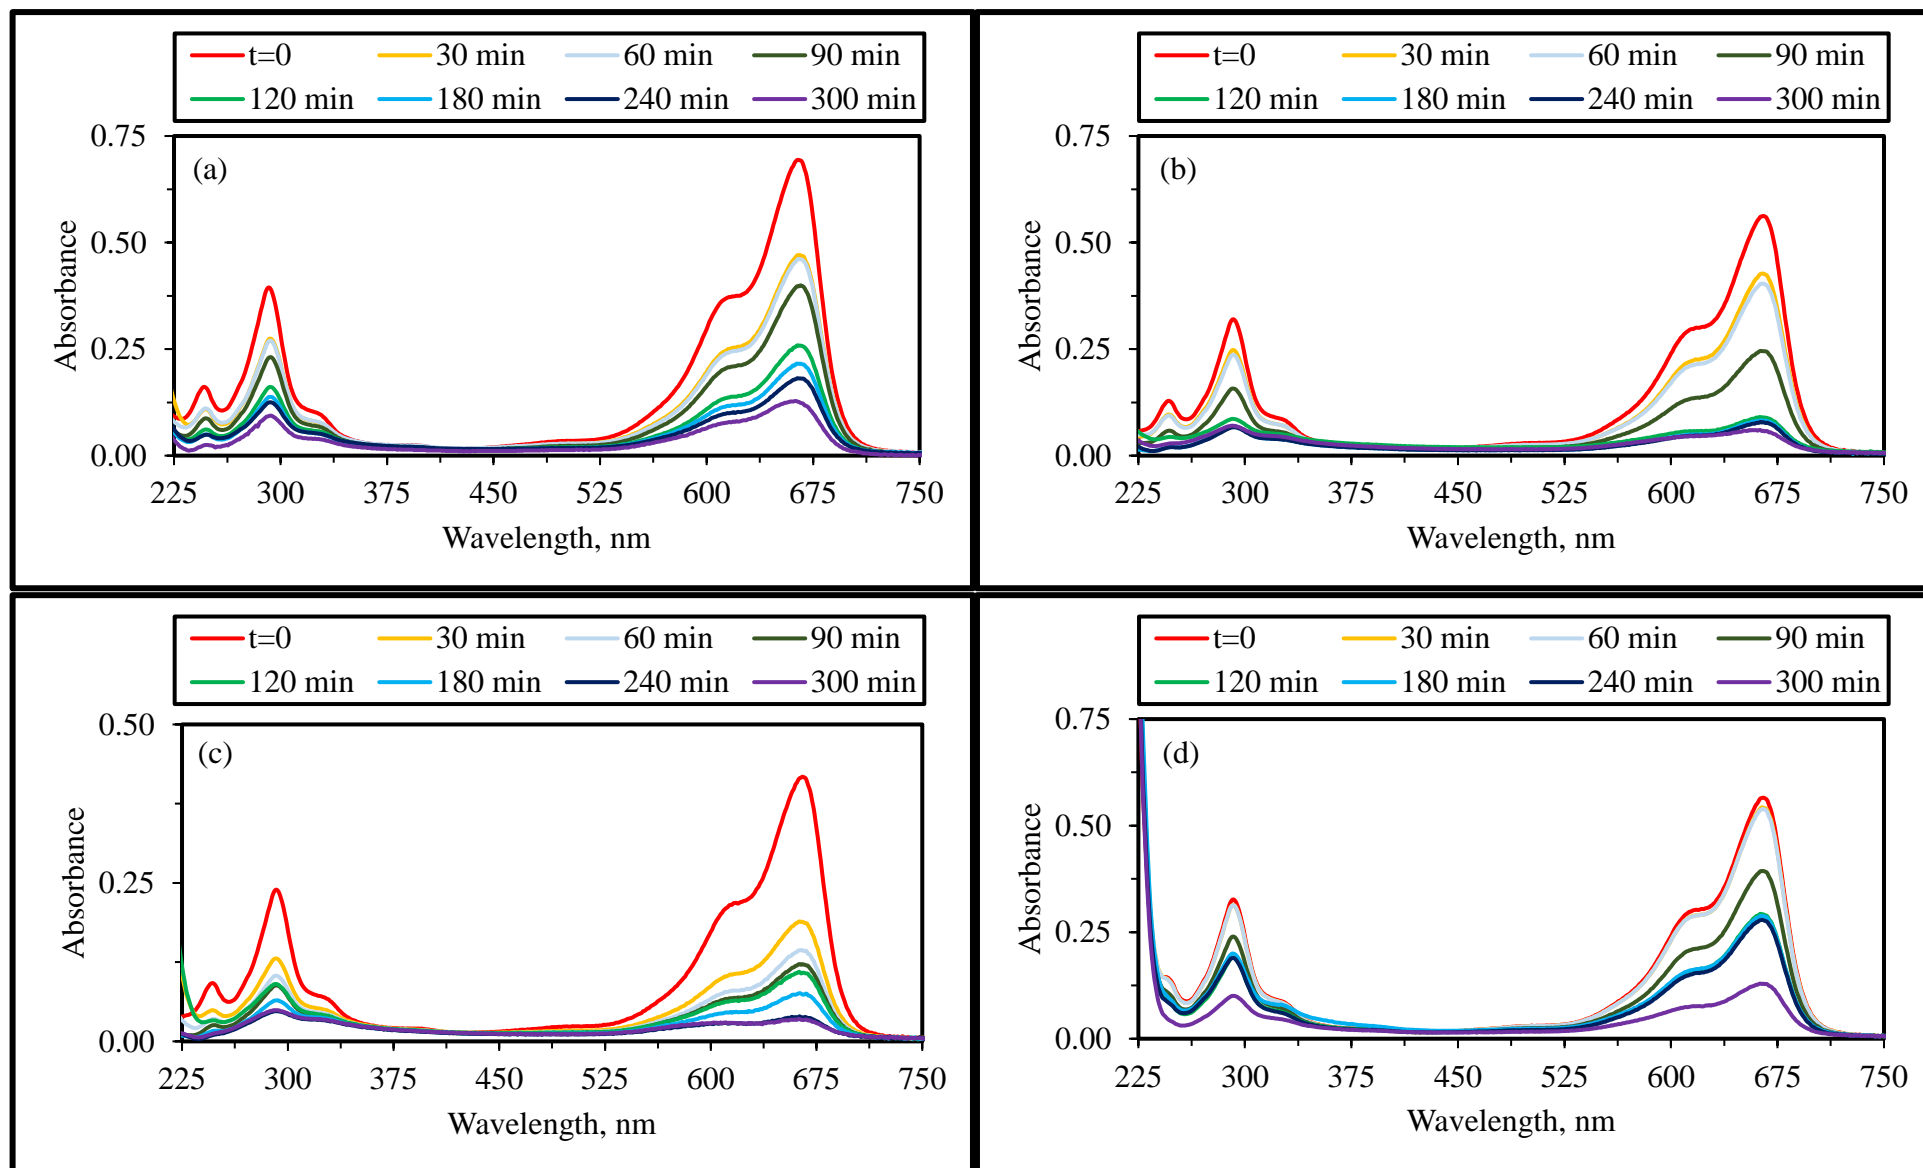

**Figure S6.** UV-vis absorption spectra of MB using 0.50 mg/mL dose of (a) DC-11, (b) DC-12, (c) MDC-11, and (d) MDC-12.
